# Supplementary material
Source: publisher figshare collection journal article supplement (https://karger.figshare.com/ndownloader/files/28970580)
Supplement: Supplementary file 1 [file 28970580]

| Supplementary table 7. Adjusted effects of different glycemic state markers on regional brain volumes of DMN areas from stepwise regression model. (n=170) | | | | | | | | | | | | | | | | |
| --- | --- | --- | --- | --- | --- | --- | --- | --- | --- | --- | --- | --- | --- | --- | --- | --- |
| DMN ROI | Model 1a | | | | | | | | Model 2b | | | | | | | |
| HbA1c | | Fasting glucose | | HOMA-IR | | Insulin | | HbA1c | | Fasting glucose | | HOMA-IR | | Insulin | |
| β(SE) | p† | β(SE) | p† | β(SE) | p† | β(SE) | p† | β(SE) | p† | β(SE) | p† | β(SE) | p† | β(SE) | p† |
| Hippocampus (L) | -60.42 (26.74) | 0.055 | **-2.42 (0.90)** | **0.029*** | -24.48 (11.12) | 0.062 | -6.17 (4.27) | 0.155 | -60.42 (26.74) | 0.065 | **-2.42 (0.90)** | **0.032*** | -24.48 (11.12) | 0.068 | -6.17 (4.27) | 0.155 |
| Hippocampus (R) | -57.31 (26.42) | 0.065 | **-2.81 (0.88)** | **0.015*** | **-24.18 (9.80)** | **0.042*** |  |  | -57.31 (26.42) | 0.070 | **-2.81 (0.88)** | **0.012*** | **-24.18 (9.80)** | **0.039*** | -5.67 (3.51) | 0.116 |
| Medial orbitofrontal (L) |  |  |  |  |  |  |  |  |  |  |  |  |  |  |  |  |
| Medial orbitofrontal (R) |  |  |  |  | 26.83 (16.18) | 0.119 |  |  |  |  |  |  |  |  |  |  |
| Rostral anterior cingulate (L) |  |  |  |  | 18.71 (13.00) | 0.155 |  |  |  |  |  |  |  |  |  |  |
| Rostral anterior cingulate (R) |  |  |  |  |  |  |  |  |  |  |  |  |  |  |  |  |
| Caudal anterior cingulate (L) |  |  |  |  |  |  |  |  |  |  |  |  |  |  |  |  |
| Caudal anterior cingulate (R) |  |  |  |  |  |  |  |  |  |  |  |  |  |  |  |  |
| Posterior cingulate (L) | 47.2 (29.65) | 0.132 |  |  |  |  |  |  |  |  |  |  |  |  |  |  |
| Posterior cingulate (R) |  |  |  |  |  |  |  |  |  |  |  |  |  |  |  |  |
| Isthmus (L) |  |  |  |  |  |  |  |  |  |  |  |  |  |  |  |  |
| Isthmus (R) |  |  |  |  |  |  |  |  |  |  |  |  |  |  |  |  |
| Precuneus (L) |  |  | -3.48 (1.96) | 0.108 |  |  |  |  |  |  | -3.48 (1.96) | 0.113 |  |  |  |  |
| Precuneus (R) |  |  |  |  |  |  |  |  |  |  |  |  |  |  |  |  |
| Supramarginal (L) |  |  |  |  | -74.19 (40.26) | 0.098 | -29.79 (14.21) | 0.076 |  |  |  |  | -74.19 (40.26) | 0.103 | -29.79 (14.21) | 0.072 |
| Supramarginal (R) |  |  |  |  |  |  |  |  |  |  |  |  |  |  |  |  |
| Abbreviations: DMN, default mode network; ROI, region of interest; L, left hemisphere; R, right hemisphere; β, unstandardized regression coefficient; SE, standard error. a Stepwise regression model: Dependent variable: regional volume of each area in DMN. Covariates include age, gender, BMI, years of education, CIRS-G-TS, and corresponding glycemic state marker.  b Stepwise regression model: Dependent variable: regional volume of each area in DMN. Covariates include age, gender, BMI, years of education, CIRS-G-SI, and corresponding glycemic state marker.  † Adjusted p-value via Benjamini-Hochberg procedure. * p<.05 | | | | | | | | | | | | | | | | |
|  |
|  |
|  |
|  |
